# Supplementary material for: A new conceptual model of pesticide transfers from agricultural land to surface waters with a specific focus on metaldehyde
Source: Royal Society of Chemistry journal article supplement (doi:10.1039/c9em00492k), 2020-01-01
Supplement: c9em00492k1.pdf [file c9em00492k1.pdf]

**A new conceptual model of pesticide transfers from  
agricultural land to surface waters with a specific  
focus on metaldehyde**

**SUPPLEMENTARY INFORMATION**

M.J. Whelan<sup>1\*</sup>, A. Ramos<sup>2</sup>, R. Villa<sup>2,3</sup>, I. Guymer<sup>4</sup>, B. Jefferson<sup>2</sup>, M. Rayner<sup>1</sup>

<sup>1</sup> Centre for Landscape & Climate Research, School of Geography, Geology and the  
Environment, University of Leicester, UK

<sup>2</sup> Cranfield University, UK

<sup>3</sup> Department of Engineering & Sustainability, De Montfort University, Leicester, UK

<sup>4</sup> Department of Civil Engineering, University of Sheffield, UK

\*Author for Correspondence: [mjw72@le.ac.uk](mailto:mjw72@le.ac.uk)

## S1 Arrhenius Equation

The value of  $k_{deg}$  is derived from dissipation half lives ( $DT_{50}$ ) reported in the literature with correction for temperature using the Arrhenius equation:

$$k_{deg} = k_{ref} \cdot e^{\left( \frac{Ea}{R} \left( \frac{1}{T_{ref}} - \frac{1}{T_{env}} \right) \right)} \quad (14)$$

where  $k_{ref}$  is the degradation rate constant derived from a  $DT_{50}$  at a reference temperature ( $T_{ref}$ , K),  $Ea$  is the Activation Energy ( $J \text{ mol}^{-1}$ ),  $R$  is the gas constant ( $8.314 \text{ J mol}^{-1} \text{ K}^{-1}$ ) and  $T_{env}$  is the environmental (soil) temperature (K), which varies over time. A value of  $65.4 \text{ kJ mol}^{-1}$  was used for  $Ea$ , as recommended by EFSA (2017).

## S2 Soil Properties

Pertinent soil properties for the prevailing soil type in the catchment (the Hanslope soil series) are shown in Table S1 below.

**Table S1.** Soil Properties for the Hanslope Soil Series, the dominant soil type in the Hanslope Soil Association (Cranfield University, 2019). HOST is the Hydrology of Soil Types (Boorman et al., 1995). BFI is the soil Base Flow Index which is derived from HOST.

| Property     | Value                                   |
|--------------|-----------------------------------------|
| Soil Group   | Calcareous pelosol                      |
| Texture      | Clay loam over stony, calcareous clay   |
| Clay Content | 42%                                     |
| $K_{sat}$    | $1.25 \text{ mm h}^{-1}$ (Kellet, 1975) |
| HOST Class   | 21                                      |
| BFI          | 0.32                                    |

50

### 51 S3 Distribution of Metaldehyde Applications

52 We assumed that the timing of application was distributed as a (discrete) Poisson  
53 distribution over (arbitrarily) approximately two weeks around this date (corresponding to  $\lambda =$   
54 7 days). This is illustrated in Figure S1.

55

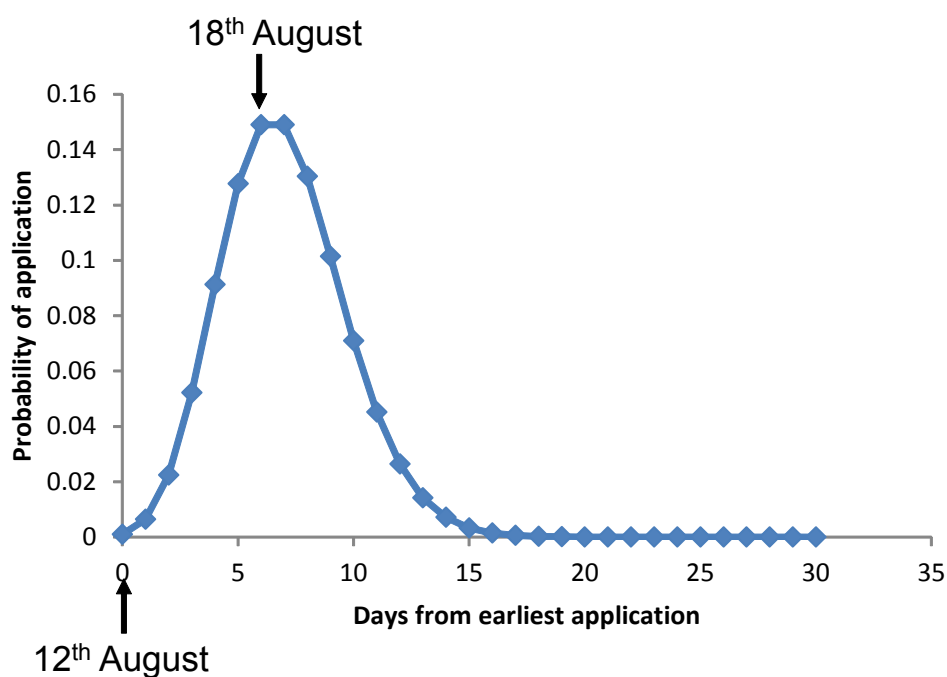

56

57 **Figure S1.** Poisson distribution for the probability of metaldehyde applications in the  
58 catchment over 30 days after the initial feasible application date ( $\lambda = 7$  days). The start of  
59 the distribution corresponds to the 12<sup>th</sup> of August, with peak application occurring on the 18<sup>th</sup>  
60 and 19<sup>th</sup> of August.

61

62

63 **S4 Sensitivity Analysis of the Pesticide Model**

64 A simple one-at-a-time sensitivity analysis of the pesticide model was conducted. The  
 65 following five parameters were considered: (i) the application rate ( $E_t$ ); (ii) the dissipation half  
 66 life ( $DT_{50}$ ); (iii) the organic carbon to water partition coefficient ( $K_{OC}$ ); (iv) the initial  
 67 penetration depth for pesticide ( $z_{mix}$ ); and (v) the exponent for pesticide displacement ( $\alpha$ ).  
 68 Initial default values for each parameter are shown in Table S2. Each parameter was  
 69 changed one at a time in steps of 25% above and below these default values, leaving all the  
 70 other parameters at their default values. Sensitivity was assessed in terms of the relative  
 71 change in three goodness of fit metrics (the correlation coefficient,  $r$ ; the Root Mean Squared  
 72 Error, RMSE and the Nash Sutcliffe Efficiency, NSE) comparing predicted metaldehyde  
 73 concentrations with measured concentrations at the catchment outlet.

74

75 **Table S2.** Initial default values for parameters considered in the pesticide model sensitivity  
 76 analysis.

77

| Parameter                      | Default Value | Source                 |
|--------------------------------|---------------|------------------------|
| $E_t$ (kg ha <sup>-1</sup> )   | 0.18          | Typical Label Rate     |
| $DT_{50}$ (days)               | 5.1           | PPDB (2018)            |
| $K_{OC}$ (L kg <sup>-1</sup> ) | 240           | PPDB (2018)            |
| $z_{mix}$ (mm)                 | 2             | Brown and Hollis, 1998 |
| $\alpha$ (dimensionless)       | 1.5           | This paper             |

78

Changes in  $r$ , RMSE and NSE with changes in each parameter value are shown in Figure S2. Note that better model fits are suggested by increases in  $r$  and NSE and by decreases in RMSE. The model was relatively insensitive to changes in  $z_{mix}$  and  $K_{OC}$ . All three metrics were most sensitive to changes in  $DT_{50}$  across the range of values evaluated, with improved model fit as  $DT_{50}$  increased. The model was also quite sensitive to  $a$ , but only at values  $> 1.5$ . Values of  $a < 1.5$  resulted in numerical instability. The model was moderately sensitive to  $E_t$ , with performance decreasing as  $E_t$  was increased and decreased away from the default value. This was because the initial peak metaldehyde concentrations were better predicted at moderately high  $E_t$  rates but later peaks were still underestimated due to the high default dissipation rate constant assumed.

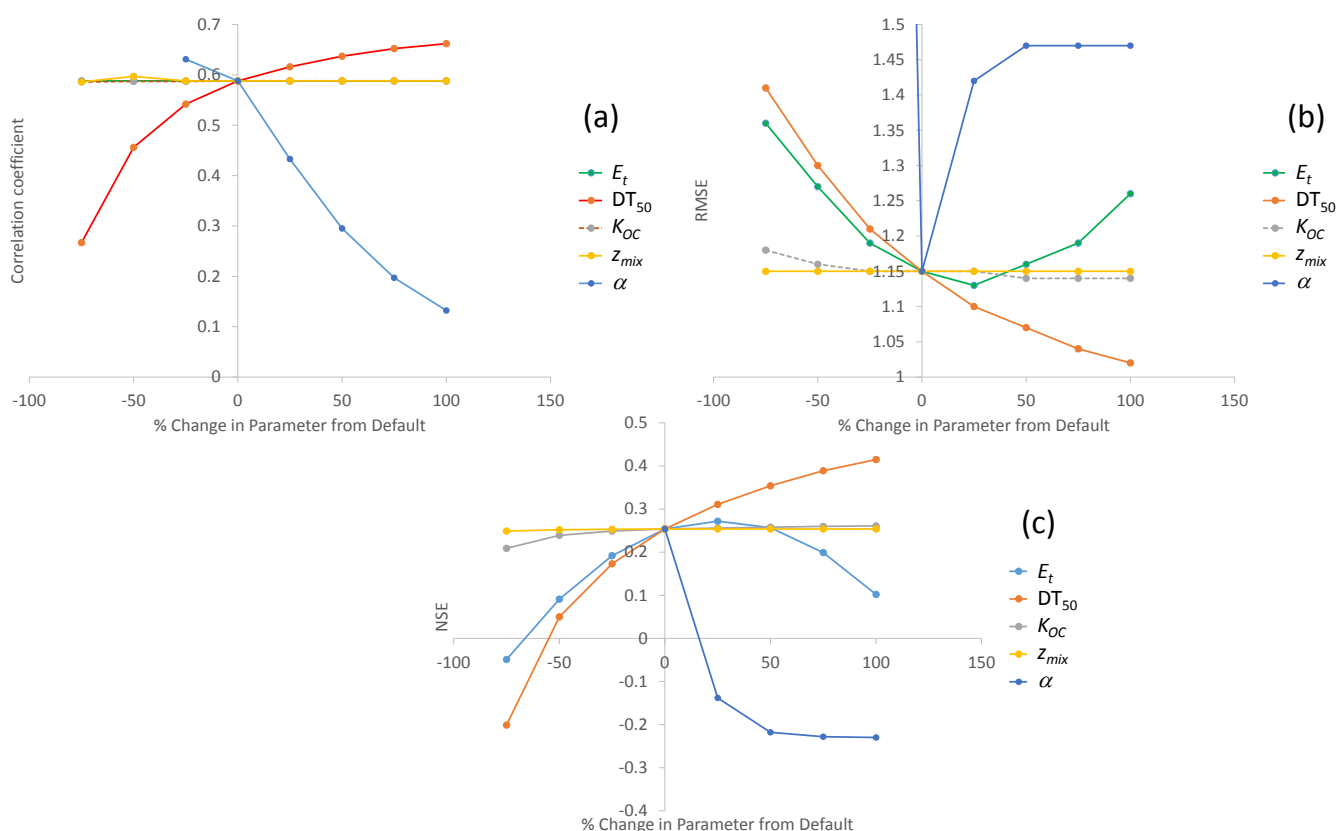

**Figure S2.** Changes in goodness of fit metrics in response to relative changes in key pesticide parameters in one-at-a-time sensitivity analysis. (a) correlation coefficient; (b) RMSE and (c) NSE.

96

## 97 **Additional References**

98

99 Boorman D.B., Hollis J.M., Lilly, A. (1995) *Hydrology of soil types: a hydrologically based*  
100 *classification of the soils of the United Kingdom*. Institute of Hydrology Report No. 126,  
101 Wallingford, UK

102 Cranfield University (2019) The Soils Guide. Available: [www.landis.org.uk](http://www.landis.org.uk). Cranfield  
103 University, UK. Last accessed 26/12/2019

104 EFSA (2017) EFSA Guidance Document for predicting environmental concentrations of  
105 active substances of plant protection products and transformation products of these active  
106 substances in soil. *EFSA Journal* **15**(10): 4982. European Food Safety Authority.

107

108
